# Supplementary material for: Investigating the Role of Heparanase in Breast Cancer Development Utilising the MMTV-PyMT Murine Model of Mammary Carcinoma
Source: MDPI journal article supplement (doi:10.3390/cancers15113062), 2023-06-05

## Supplementary Materials

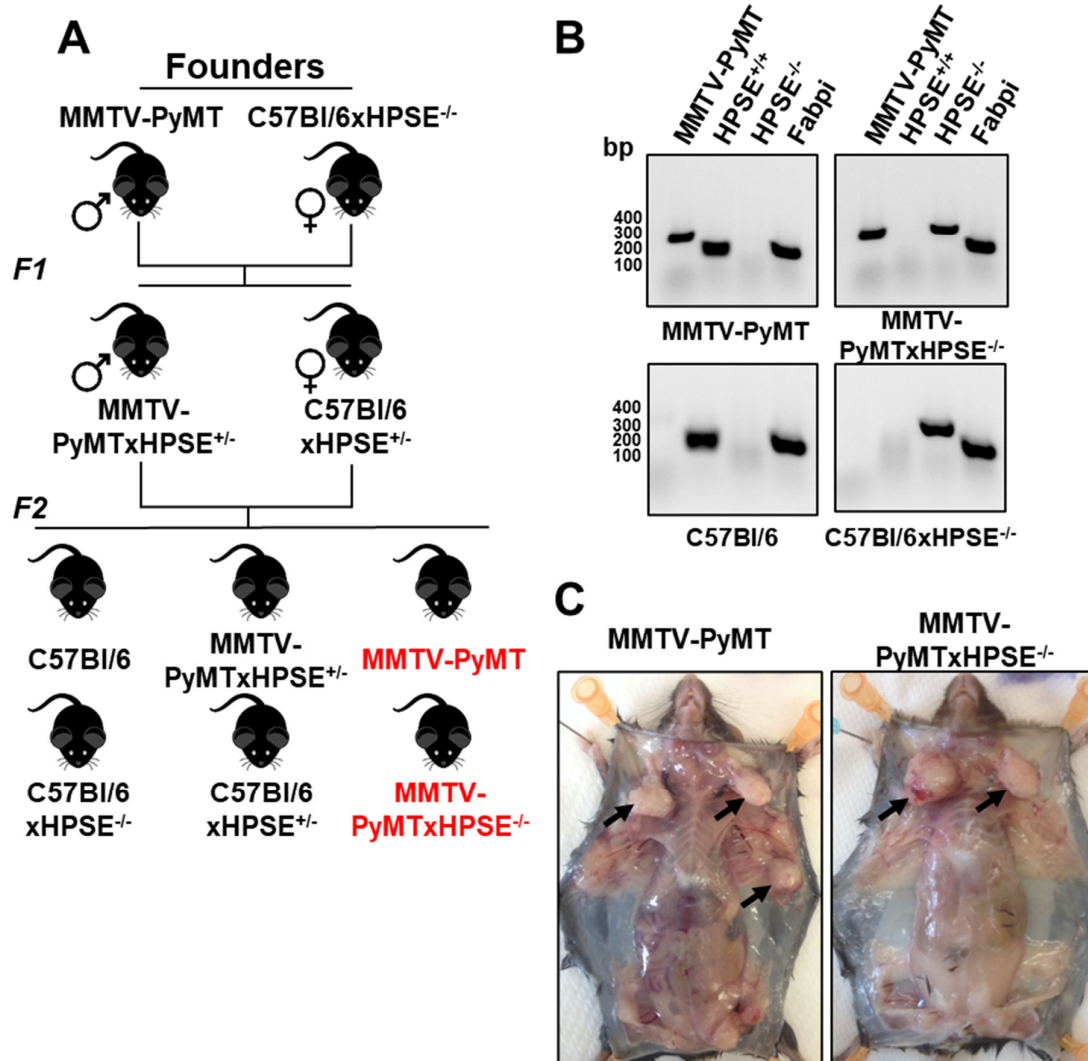

**Supplementary Figure S1. The generation of MMTV-PyMTxHPSE<sup>-/-</sup> mice**

**(A)** The schematic of the breeding strategy used to generate MMTV-PyMTxHPSE<sup>-/-</sup> mice. The genetic backgrounds of animals resulting from the F2 generation that were used in subsequent *in vivo* studies are indicated in red. **(B)** Genotypes of MMTV-PyMT, MMTV-PyMTxHPSE<sup>-/-</sup>, C57BI/6 and C57BI/6xHPSE<sup>-/-</sup> animals were confirmed by PCR. **(C)** Representative photographs of spontaneous mammary tumour-bearing female MMTV-PyMT and MMTV-PyMTxHPSE<sup>-/-</sup> mice at 20-weeks of age, showing visible mammary tumours (arrows).

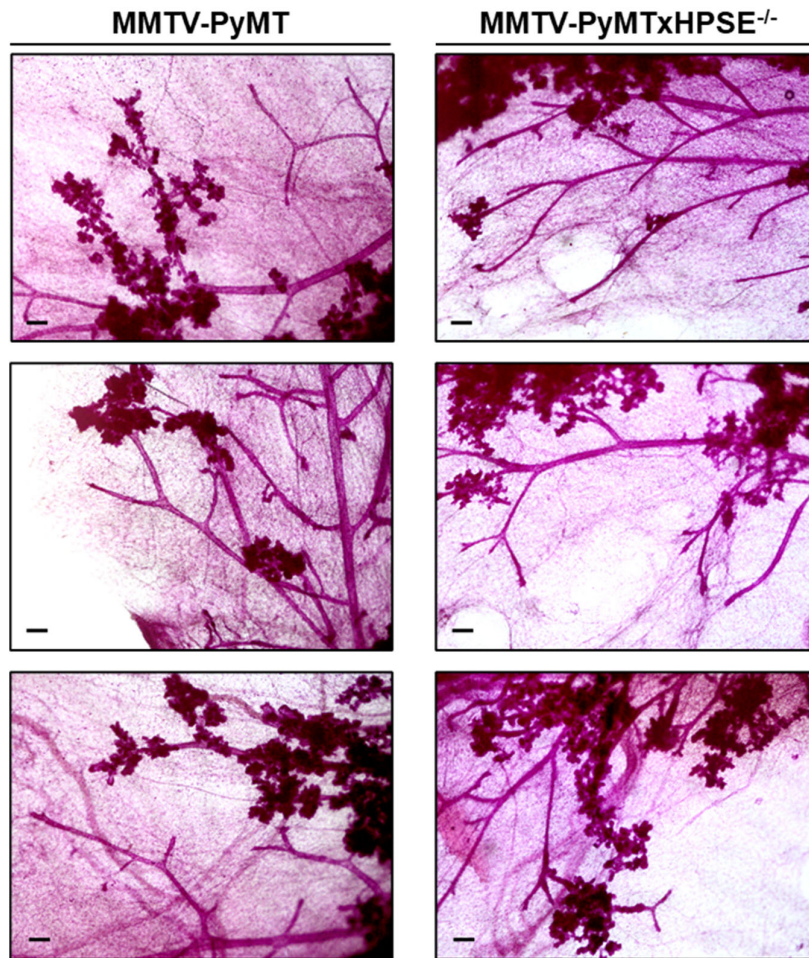

**Supplementary Figure S2. Mammary gland architecture of MMTV-PyMT and MMTV-PyMTxHPSE<sup>-/-</sup> mice at the ethical tumour volume end point**

Whole-mounted 4<sup>th</sup> inguinal mammary glands of MMTV-PyMT and MMTV-PyMTxHPSE<sup>-/-</sup> mice excised at the ethical tumour volume end point appeared similar in architecture upon visual observation. Representative images of one mammary gland per mouse,  $n = 3$  per group. Scale bars = 50  $\mu\text{m}$ .

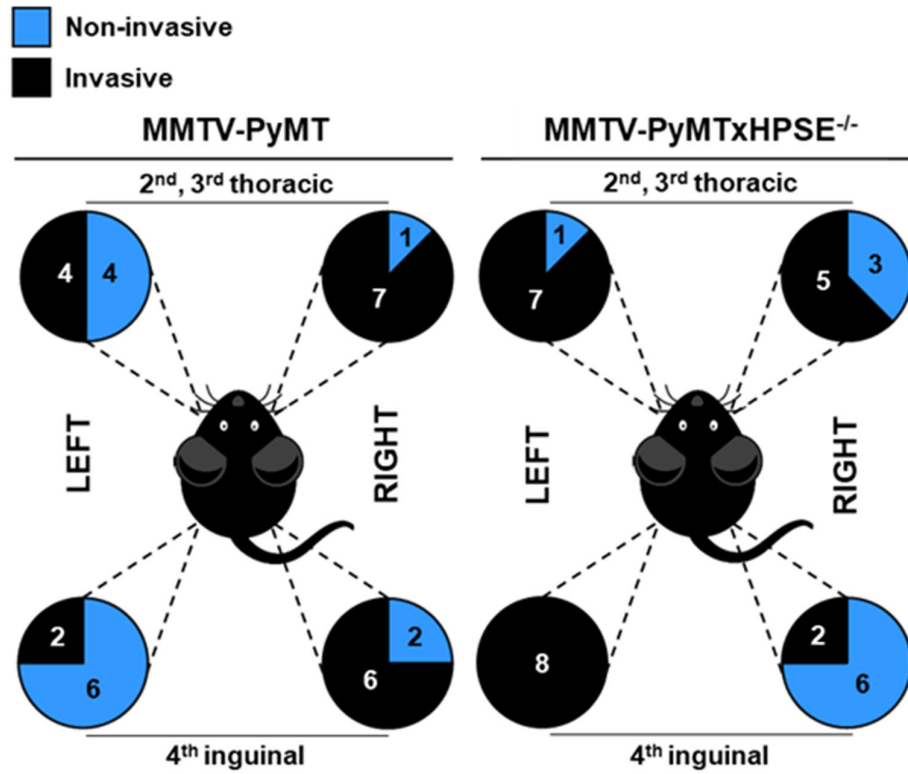

**Supplementary Figure S3. The role of HPSE in early mammary tumour development in MMTV-PyMT and MMTV-PyMTxHPSE<sup>-/-</sup> mice**

A pie-chart representation of invasive vs non-invasive phenotypes observed in each of the excised mammary glands of MMTV-PyMT and MMTV-PyMTxHPSE<sup>-/-</sup> mice as reported in figure 6 ( $n = 8$ ).

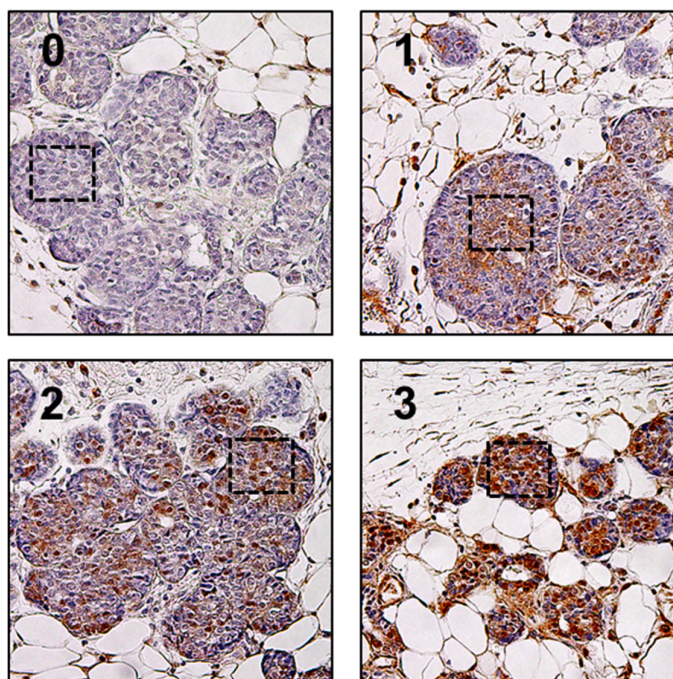

**Supplementary Figure S4. H-scoring of mammary tumour sections following IHC staining**

A score of 0 – 3 was assigned to four distinct levels of staining, from no staining to highest intensity.



**Supplementary Figure S5.** Original Western Blots for Figure 1A.

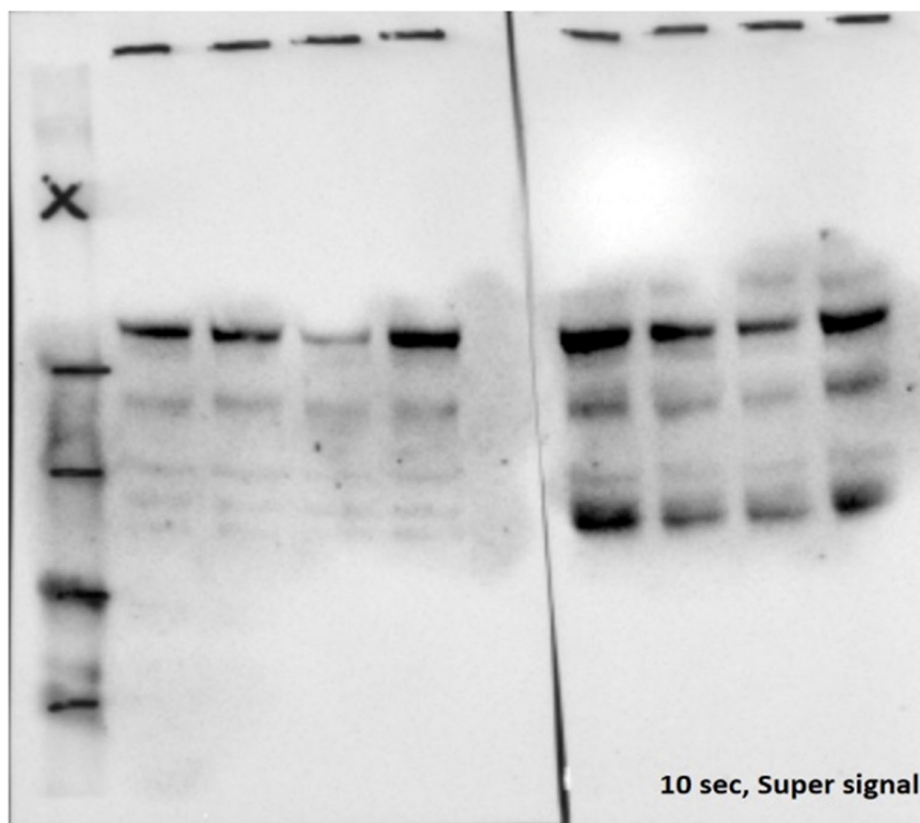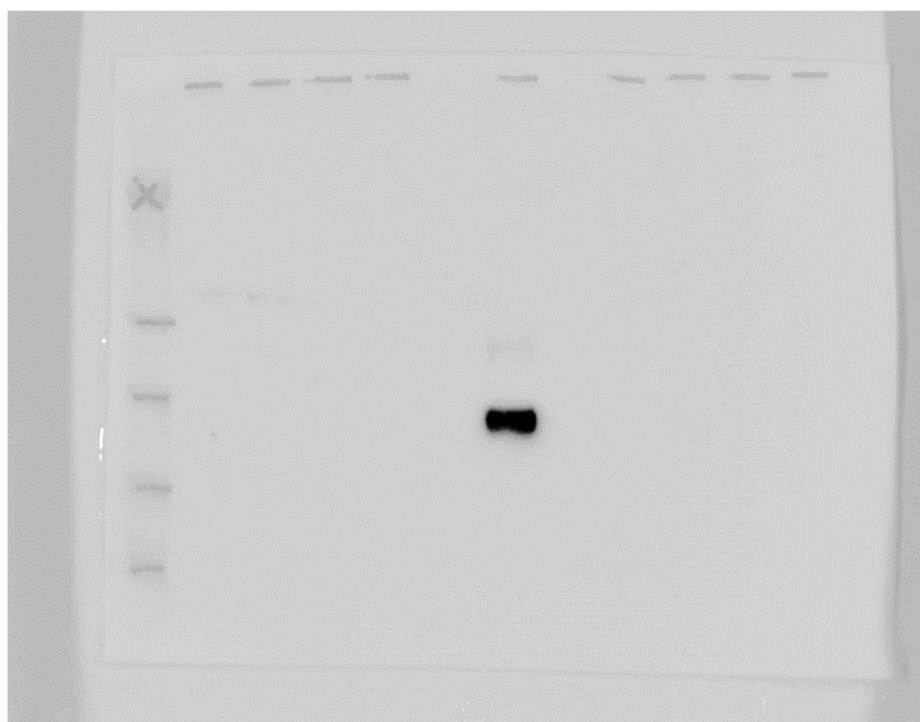

Supplement: s1 [file s1]
